# Supplementary material
Source: MDPI journal article supplement (https://www.mdpi.com/2075-4701/14/1/78)
Supplement: s1 [file s1]

### Supplementary material

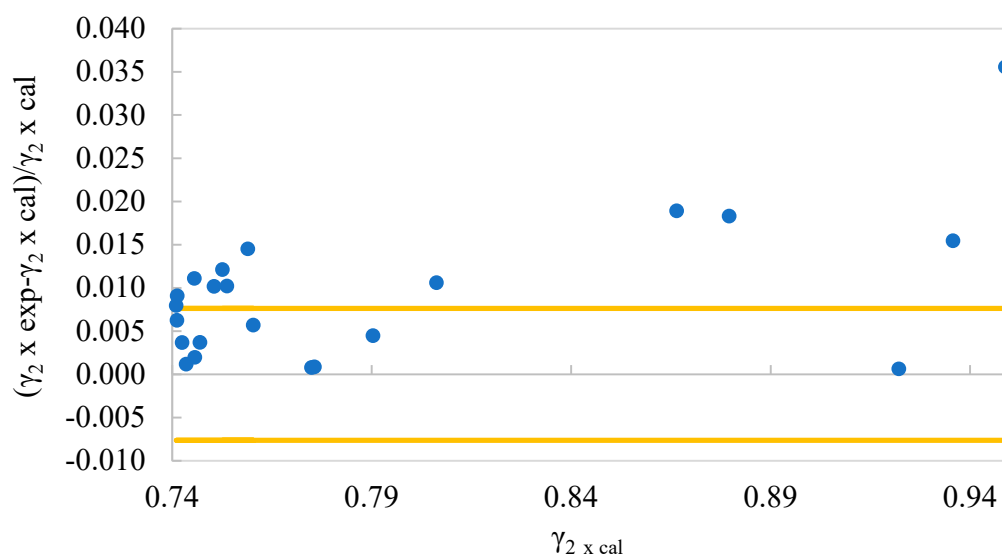

**Figure S1.** Relative deviation between experimental and calculated values of the activity coefficient at 298.15K from the data of [1]. The horizontal lines correspond to the average relative deviations of the fit.

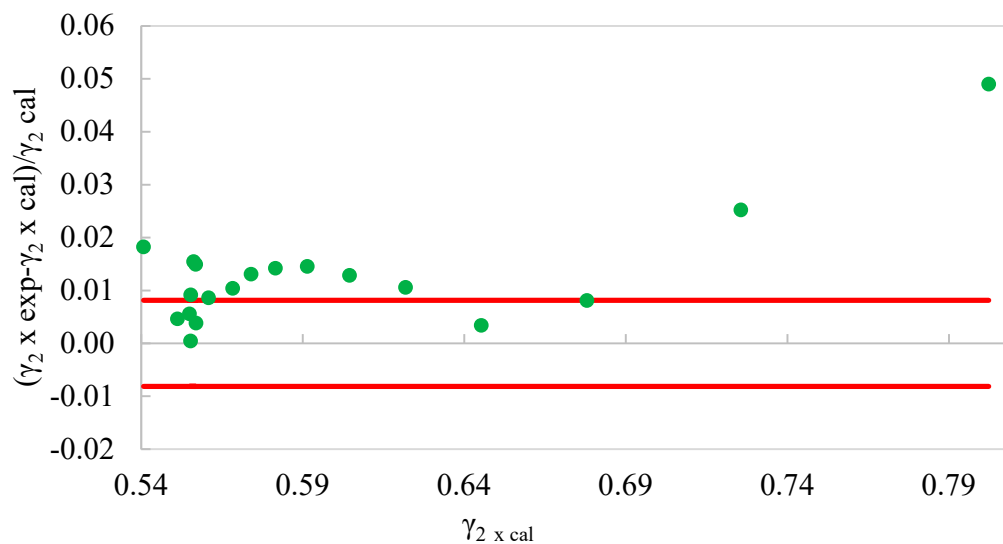

**Figure S2.** Relative deviation between experimental and calculated values of the activity coefficient at 298.15°K from the data of [27]. The horizontal lines correspond to the average relative deviations of the fit.

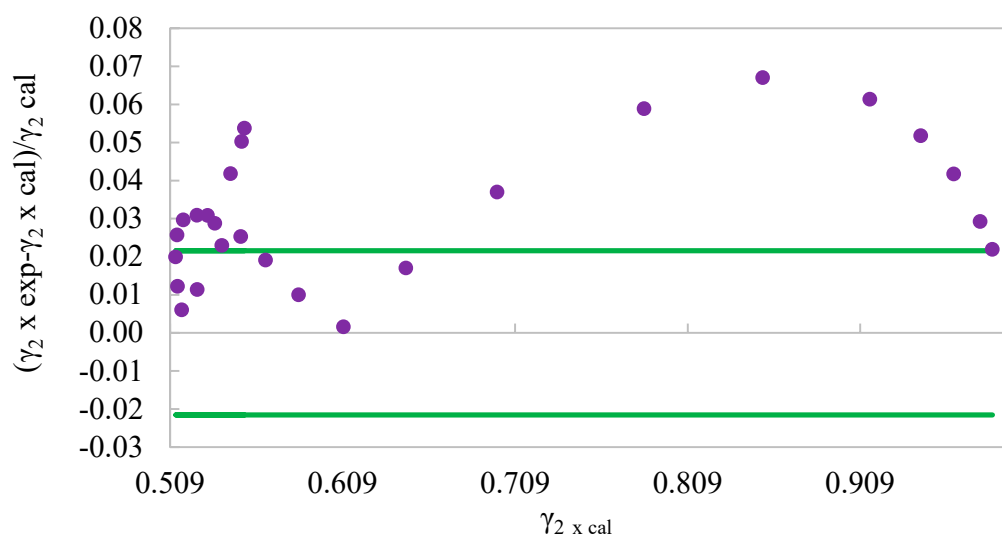

**Figure S3.** Relative deviation between experimental and calculated values of the activity coefficient at 298.15°K from the data of [28]. The horizontal lines correspond to the average relative deviations of the fit.

**Table S1.** Density and dielectric constant data of ethanol at different temperatures

| T/K    | $\rho$ (kg/m <sup>3</sup> ) | T/K    | D     |
|--------|-----------------------------|--------|-------|
| 288.15 | 0.7936                      | 293.15 | 25    |
| 298.15 | 0.7851                      | 298.15 | 24.2  |
| 308.15 | 0.7764                      | 303.15 | 23.55 |
| 318.15 | 0.7676                      | 313.15 | 22.2  |
| 328.15 | 0.7586                      | 323.15 | 20.87 |

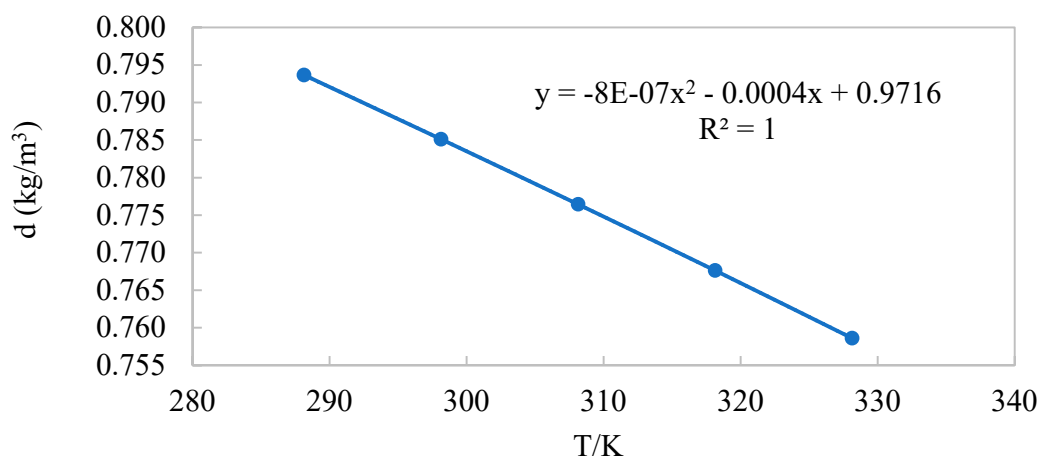

**Figure S4.** Density at different temperatures.

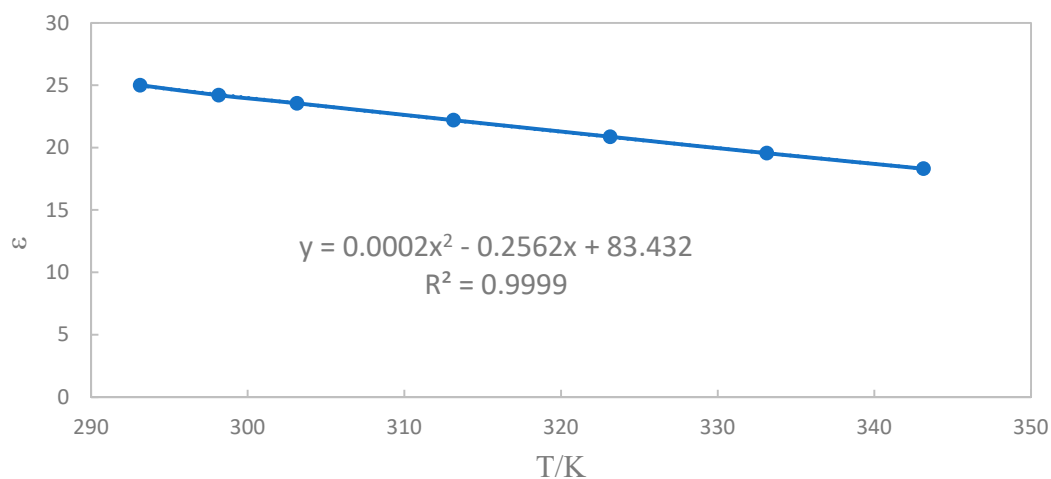

**Figure S5.** Dielectric constant at different temperatures.

**Table S2.** Solubility product,  $K_{ps}$ , initial solubility,  $X_0$ , water activity,  $a$ , amount of  $\text{CHLiO}_2$  precipitate in mole fraction and  $\text{g/kg solv}$ , as a function of ethanol weight percentage, and yield ( $Y$ ) of the process at 283.15 K.

| <b>K<sub>ps</sub></b> | <b>X<sub>0</sub></b> | <b>a</b> | <b>Ppt<br/>(frac.<br/>Mol)</b> | <b>Ppt<br/>(g/kg solv)</b> | <b>W%<br/>Ethanol</b> | <b>Y</b> |
|-----------------------|----------------------|----------|--------------------------------|----------------------------|-----------------------|----------|
| 0.0225                | 0.1123               | 0.7631   | 0                              | 0.0004                     | 0                     | 0.00     |
|                       |                      | 0.7099   | 0.0147                         | 59.4903                    | 10.11                 | 5.95     |
|                       |                      | 0.6536   | 0.0195                         | 73.1100                    | 20.12                 | 7.31     |
|                       |                      | 0.6348   | 0.0266                         | 91.1184                    | 30.43                 | 9.11     |
|                       |                      | 0.5957   | 0.0326                         | 102.3803                   | 40.47                 | 10.24    |
|                       |                      | 0.5597   | 0.0305                         | 86.0589                    | 51.72                 | 8.61     |
|                       |                      | 0.5429   | 0.0317                         | 80.9148                    | 61.19                 | 8.09     |
|                       |                      | 0.4281   | 0.0263                         | 59.4085                    | 71.63                 | 5.94     |
|                       |                      | 0.0186   | 0.0010                         | 2.1035                     | 81.35                 | 0.21     |

**Table S3.** Solubility product, K<sub>ps</sub>, initial solubility, X<sub>0</sub>, water activity, a, amount of CHLiO<sub>2</sub> precipitate in mole fraction and g/kg solv, as a function of ethanol weight percentage, and yield (Y) of the process at 293.15 K.

| <b>K<sub>ps</sub></b> | <b>X<sub>0</sub></b> | <b>a</b> | <b>Ppt<br/>(frac.<br/>Mol)</b> | <b>Ppt<br/>(g/kg solv)</b> | <b>W%<br/>Ethanol</b> | <b>Y</b> |
|-----------------------|----------------------|----------|--------------------------------|----------------------------|-----------------------|----------|
| 0.0197                | 0.1206               | 0.7563   | 0                              | 0.1961                     | 0                     | 0.02     |
|                       |                      | 0.6987   | 0.0172                         | 70.5595                    | 10.29                 | 7.06     |
|                       |                      | 0.6596   | 0.0274                         | 102.3469                   | 21.76                 | 10.23    |
|                       |                      | 0.6268   | 0.0294                         | 101.8818                   | 30.52                 | 10.19    |
|                       |                      | 0.6026   | 0.0338                         | 106.8965                   | 40.53                 | 10.69    |
|                       |                      | 0.6010   | 0.0347                         | 99.4729                    | 50.76                 | 9.95     |
|                       |                      | 0.5961   | 0.0365                         | 94.2690                    | 60.70                 | 9.43     |
|                       |                      | 0.3786   | 0.0245                         | 55.7608                    | 71.6                  | 5.58     |
|                       |                      | 0.0060   | 0.0004                         | 0.8364                     | 81.29                 | 0.08     |

**Table S4.** Solubility product, K<sub>ps</sub>, initial solubility, X<sub>0</sub>, water activity, a, amount of CHLiO<sub>2</sub> precipitate in mole fraction and g/kg solv, as a function of ethanol weight percentage, and yield (Y) of the process at 298.15 K.

| <b>K<sub>ps</sub></b> | <b>X<sub>0</sub></b> | <b>a</b> | <b>Ppt<br/>(frac. Mol)</b> | <b>Ppt<br/>(g/kg solv)</b> | <b>W%<br/>Ethanol</b> | <b>Y</b> |
|-----------------------|----------------------|----------|----------------------------|----------------------------|-----------------------|----------|
| 0.0184                | 0.1250               | 0.7533   | 0.0000                     | 0.1093                     | 0.00                  | 0.01     |

|        |        |         |       |      |
|--------|--------|---------|-------|------|
| 0.6977 | 0.0189 | 77.6651 | 10.00 | 7.77 |
| 0.6396 | 0.0234 | 89.0865 | 20.24 | 8.91 |
| 0.5973 | 0.0284 | 99.1599 | 30.28 | 9.92 |
| 0.5509 | 0.0305 | 96.9808 | 40.60 | 9.70 |
| 0.5359 | 0.0312 | 89.5217 | 51.22 | 8.95 |
| 0.4901 | 0.0320 | 82.7153 | 60.90 | 8.27 |
| 0.3775 | 0.0254 | 57.8121 | 71.70 | 5.78 |
| 0.0169 | 0.0011 | 2.2578  | 81.64 | 0.23 |

**Table S5.** Solubility product,  $K_{ps}$ , initial solubility,  $X_0$ , water activity,  $a$ , amount of  $CHLiO_2$  precipitate in mole fraction and g/kg solv, as a function of ethanol weight percentage, and yield (Y) of the process at 303.15 K.

| $K_{ps}$ | $X_0$  | $a$    | Ppt<br>(frac. Mol) | Ppt<br>(g/kg solv) | W%<br>Ethanol | Y     |
|----------|--------|--------|--------------------|--------------------|---------------|-------|
| 0.0172   | 0.1313 | 0.7423 | 0.0000             | 0.1994             | 0.00          | 0.02  |
|          |        | 0.6839 | 0.0196             | 80.9690            | 10.40         | 8.10  |
|          |        | 0.6306 | 0.0268             | 101.4063           | 21.30         | 10.14 |
|          |        | 0.5693 | 0.0326             | 112.8889           | 32.20         | 11.29 |
|          |        | 0.5305 | 0.0342             | 105.9216           | 44.10         | 10.59 |
|          |        | 0.4780 | 0.0317             | 87.8416            | 55.20         | 8.78  |
|          |        | 0.4328 | 0.0292             | 73.4293            | 63.80         | 7.34  |
|          |        | 0.2310 | 0.0158             | 34.8422            | 74.70         | 3.48  |
|          |        | 0.0000 | 0.0000             | 0.0113             | 85.60         | 0.00  |

**Table S6.** Solubility product,  $K_{ps}$ , initial solubility,  $X_0$ , water activity,  $a$ , amount of  $CHLiO_2$  precipitate in mole fraction and g/kg solv, as a function of ethanol weight percentage, and yield (Y) of the process at 313.15 K.

| $K_{ps}$ | $X_0$  | $a$    | Ppt<br>(frac. Mol) | Ppt<br>(g/kg solv) | W%<br>Etanol | Y    |
|----------|--------|--------|--------------------|--------------------|--------------|------|
| 0.0150   | 0.1443 | 0.7212 | 0.0000             | 0.2046             | 0.00         | 0.02 |

|        |        |          |       |       |
|--------|--------|----------|-------|-------|
| 0.6683 | 0.0200 | 84.2138  | 10.00 | 8.42  |
| 0.6163 | 0.0276 | 106.5906 | 21.00 | 10.66 |
| 0.5716 | 0.0312 | 110.6054 | 31.00 | 11.06 |
| 0.5274 | 0.0360 | 114.6035 | 42.70 | 11.46 |
| 0.5285 | 0.0388 | 112.2846 | 51.80 | 11.23 |
| 0.5131 | 0.0373 | 96.7585  | 61.70 | 9.68  |
| 0.4135 | 0.0320 | 73.6483  | 71.60 | 7.36  |
| 0.0171 | 0.0013 | 2.5248   | 81.90 | 0.25  |

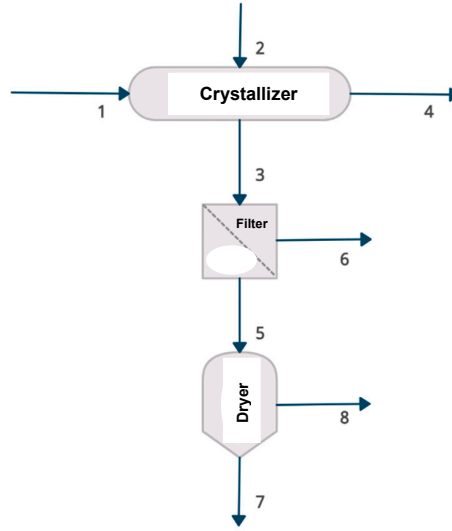

**Figure S6.** Drowning-out crystallization process of LiOH at 298.15 K

#### Mathematical definition of the terms of Equations (10)-(12) in section 2.2

$$m_i = \frac{n_i}{n_w} ; (i = 1, 2) \quad \text{Equation (S1)}$$

$$B_{11} = \lambda_{11} \quad \text{Equation (S2)}$$

$$C_{111} = \mu_{111} \quad \text{Equation (S3)}$$

$$B_{22} = \lambda_{ca} + \frac{v_c}{2v_a} \lambda_{cc} + \frac{v_a}{2v_c} \lambda_{aa} \quad \text{Equation (S4)}$$

$$C_{222}^{\phi} = \frac{3}{(v_a v_c)^{\frac{1}{2}}} (\mu_{ca} + \mu_{aa} v_a) \quad \text{Equation (S5)}$$

$$C_{222}^{\gamma} = \frac{3}{2} C_{222}^{\phi} \quad \text{Equation (S6)}$$

$$B_{12} = 2(\lambda_{1c} v_c + \lambda_{1a} v_a + \mu_{11a} v_a) \quad \text{Equation (S7)}$$

$$C_{112} = 3(\mu_{11c} v_c + \mu_{11a} v_a) \quad \text{Equation (S8)}$$

$$C_{122} = 3(\mu_{1cc} v_c^2 + 2\mu_{1ca} v_c v_a + \mu_{1aa} v_a^2) \quad \text{Equation (S9)}$$

The expressions  $B'_{12}$  and  $B'_{22}$  are the derivatives of  $B_{12}$  and  $B_{22}$  with respect to  $I$ , respectively. Using the same method as in the original Pitzer model this for univalent salts, the second global virial coefficients can be calculated with Eq. (22), where:  $\beta^{(0)}$ ,  $\beta^{(1)}$  and  $\alpha$  possess similarity to those of the original Pitzer's viral model.

$$B_{ij} = \beta_{ij}^{(0)} + \frac{2\beta_{ij}^{(1)}}{\alpha_{1,ij}^2 I} \left[ 1 - \left( 1 + \alpha_{1,ij} I^{\frac{1}{2}} \right) \exp \left( -\alpha_{1,ij} I^{\frac{1}{2}} \right) \right] \quad \text{Equation (S10)}$$

Correlation of vapor-liquid equilibrium (VLE) data of ternary systems shows that it is not sensitive to the parameter  $\alpha$ , and any value of  $\alpha$  selected close to that given by Pitzer is possible to use. Therefore, values of  $\alpha_{1,12} = \alpha_{1,22} = 2.0$  are used.
